# Supplementary material
Source: PubMed Central journal article supplement (PMC3119741)
Supplement: NIHMS298996-supplement-1_si_001.pdf [file NIHMS298996-supplement-1_si_001.pdf]

# Unraveling terminal C-domain-mediated condensation in fungal biosynthesis of imidazoindolone metabolites

*Stuart W. Haynes<sup>1§</sup>, Brian D. Ames<sup>1§</sup>, Xue Gao<sup>2</sup>, Yi Tang<sup>2</sup> and Christopher T. Walsh<sup>1\*</sup>*

<sup>1</sup>Department of Biological Chemistry & Molecular Pharmacology, Harvard Medical School, 240 Longwood Avenue, Boston, MA 02115

<sup>2</sup>Department of Chemical and Biomolecular Engineering, Department of Chemistry and Biochemistry, University of California Los Angeles, 420 Westwood Plaza, Los Angeles, CA 90095.

**Figure S1.** Alignment of TqaH and Af12060 generated using ClustalW (56/76% identity/similarity).

```
Af12060 : MTINTALPTFR-----AP--TGTSVIVVGLGFGGLTAAIESHLRGHVSVILLEKVTKVQDAGDAIVIIGPNAVRLIKSWGEQL
TqaH    : MTTDRQPS TPAPHAGNDAAPNS TGIKVIVVGVGLAGITAAIECHRKGHSVIVLEKVSELKHDAGDGIMIAPNASKVMRQWGDDEL

                20                40                60                80

Af12060 : CEEIEPHLSNATHAEMLDHHRFTVRHELGRGKGWFTNRGRLLISILYE HAR-KLGIDIRLGSRVTKYWEEDGRAGVIVNDRER
TqaH    : LAEIVLNRCDSTHVDMMDHNDNLIARQELPGKGEIVTNRGRLLVCLLFAHAKNRLGIDIRLGSRVTDYWEENGQAGVTVDGGER

                100                120                140                160

Af12060 : LAADCVICADGVHSAARAWLTGQVDTQOHS GWANFRAHMTTEQLAKDPEASWVLOGTREKDRVYVWFGDGINLAIMTMKRGQEL
TqaH    : ISGDCVVCADGVHGMSRKFTVTKKEEVTPOETGWATFRAHIQADAIANDEEAKWVLGTESEDRTYAWFGDGLNVAMMTLKRGKEV

                180                200                220                240

Af12060 : AWALMHTDKFNAHESWAGG-RASID DALATLSPWPGRLRPSSVIRHTLPEKLV DHALIYRPLDTWVSAGGRVMLIGDAHPYF
TqaH    : VVMTTHKDCYGARETWNGGGQAKMEDALAAISHWPGKHRIEAVIRHTKPHKLVNHALIYRPLRTWVISEGGRVMLIGDSAPYY

                260                280                300                320

Af12060 : PVVGQGSQAIEDGVV VATALELAGKENVPLALRVAEKIRYPRATVIQLGSS TLOEHLFWPDWEAVAKDPSVFAFPNPEWILGH
TqaH    : PVVAQGSQGIEDGAVLAIALS LAGKERVPLALQVVEKIRYPRATVIQLGSESFQATVLRSDWGKDESKRDEF RFPNPDWIFSH

                340                360                380                400                420

Af12060 : DCREYTHQVFDTVVRAVRGEGEYI PRNIPADGAYRVEDTYSPE
TqaH    : DCQSYAYQEFESVVEAIRDGKEYVPTNLPVDGVYRVENTYKRG

                440                460
```

**Figure S2.** Alignment of TqaB and Af12050 generated using ClustalW (53/75% identity/similarity). The sequence region chosen for cloning and protein expression of the standalone T-domains is indicated by a green bar. Site chosen as the start of the standalone C-domain, and as the site for C-domain swapping to generate the chimeric constructs, is indicated by a red asterisk. The active site motifs for the T- and C-domains are boxed.

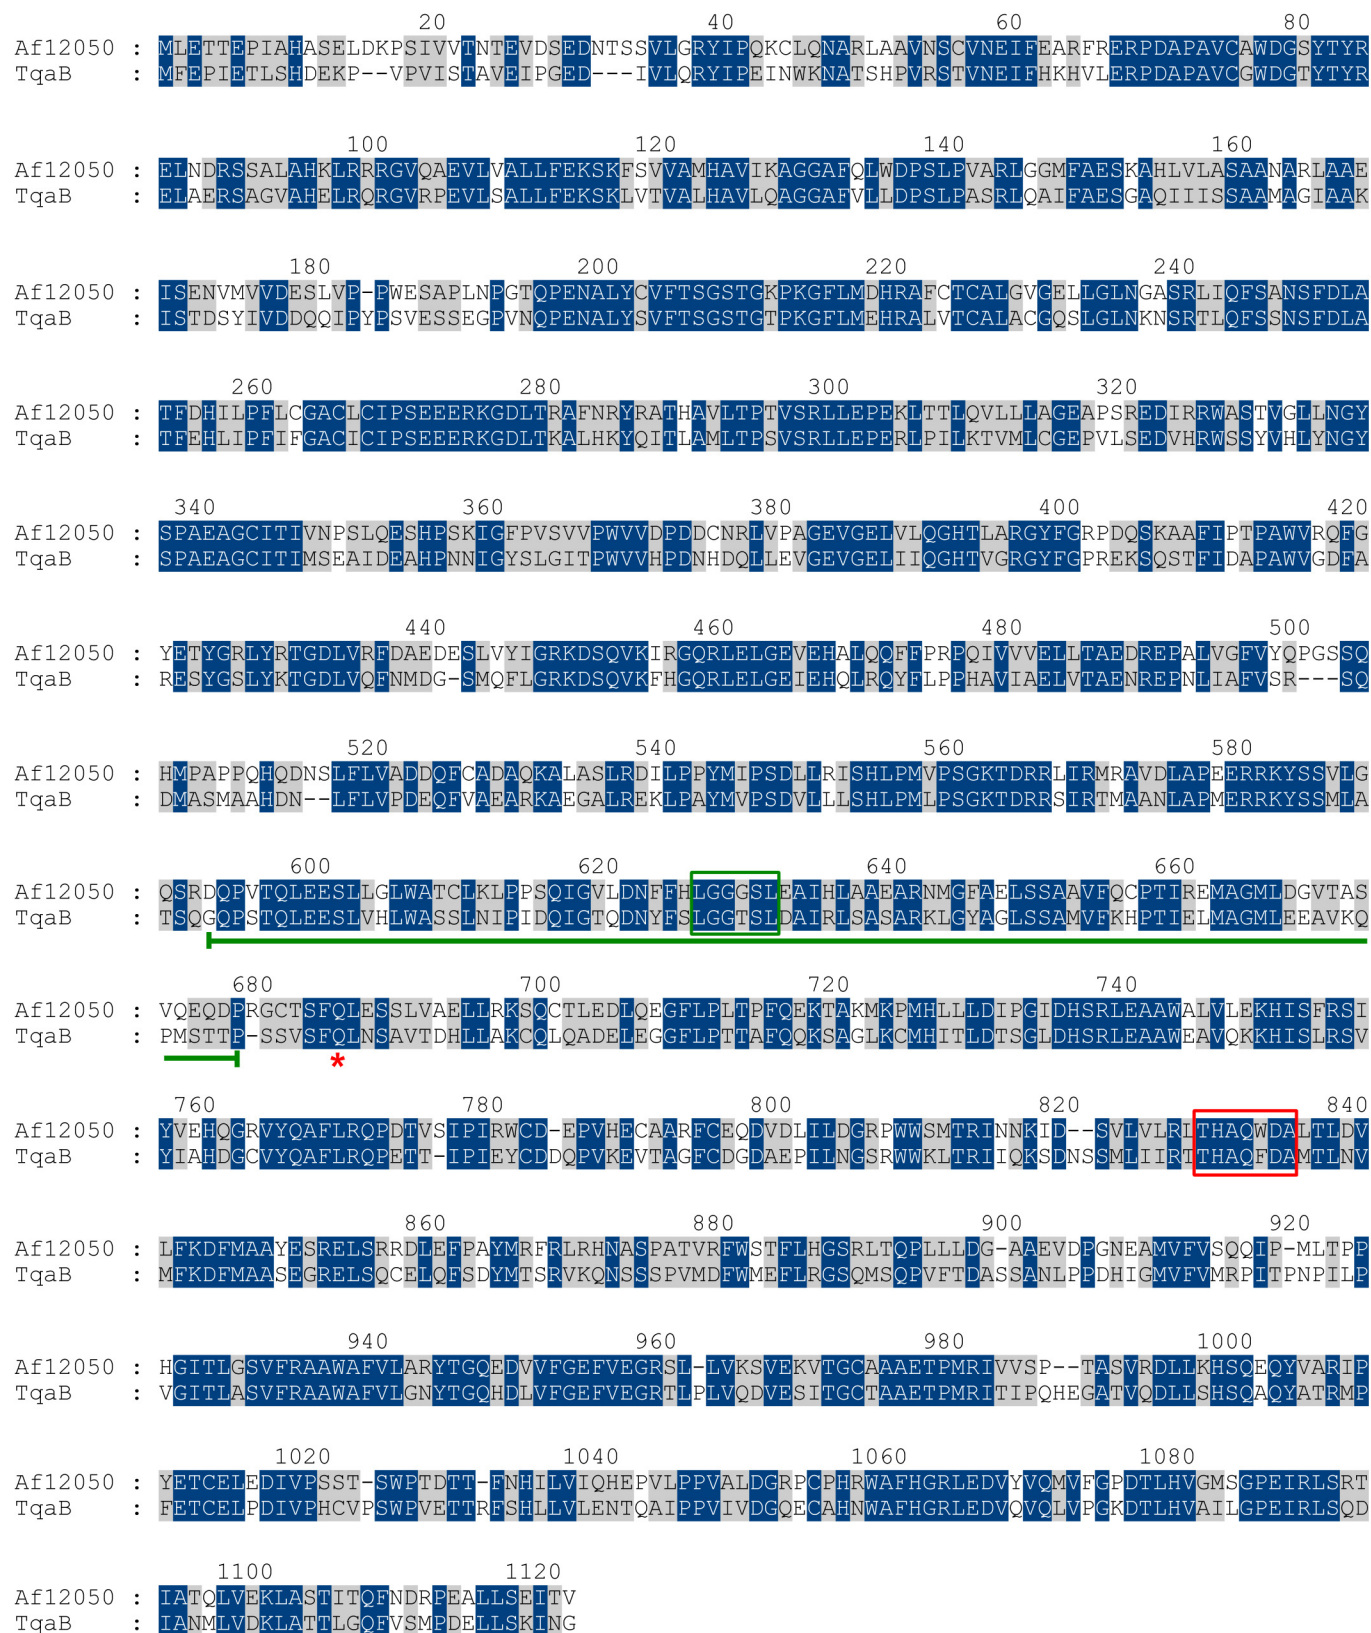

**Figure S3.** Comparison of the loading of [ $^{14}\text{C}$ ]-acetyl CoA onto the standalone apo-T-domains from Af12050 and TqaB. The percentage of loaded T-domain was calculated as a ratio of the nanomoles of  $^{14}\text{C}$ -labelled protein and the total nanomoles of T-domain included in the incubation.

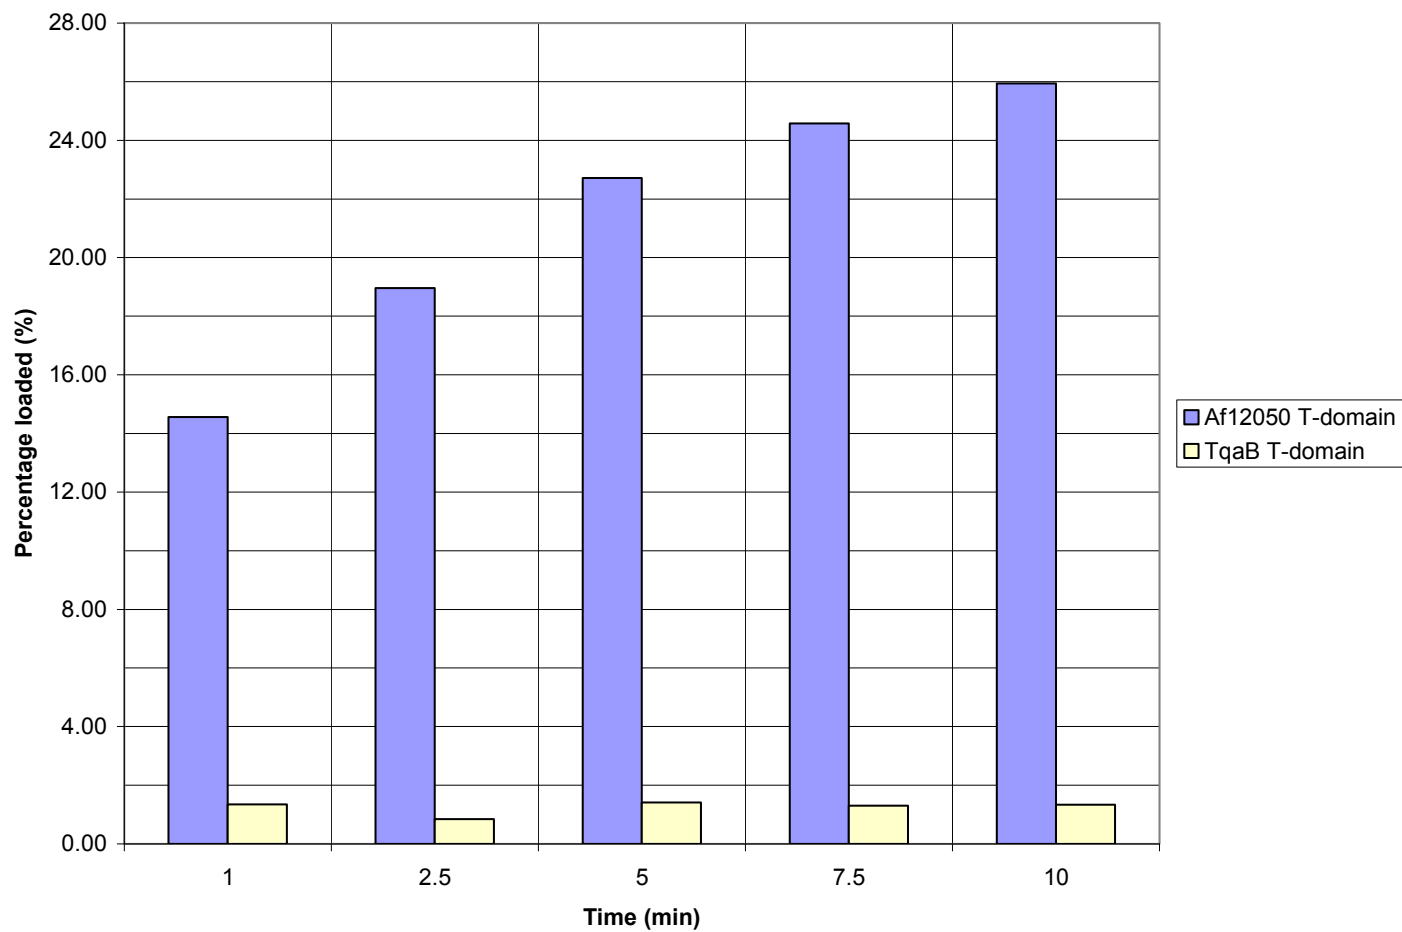

**Figure S4.** Timecourse HPLC-based assays for 2'-*epi*-FQA formation (A) Observed concentration of 2'-*epi*-FQA over time when using L-Ala SNAC and L-Ala-T-domain plus and minus TqaB C-domain, in comparison incubation of L-Ala with full-length holo-TqaB. (B) Initial rate data of 2'-*epi*-FQA formation, in the presence and absence of TqaB C-domain.

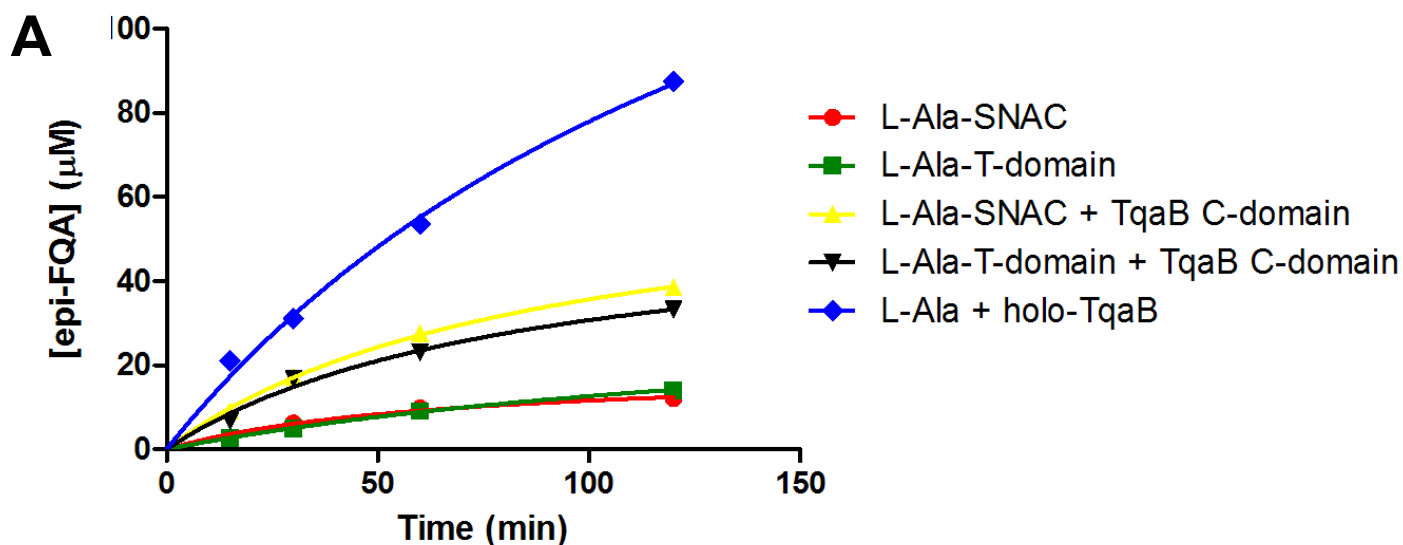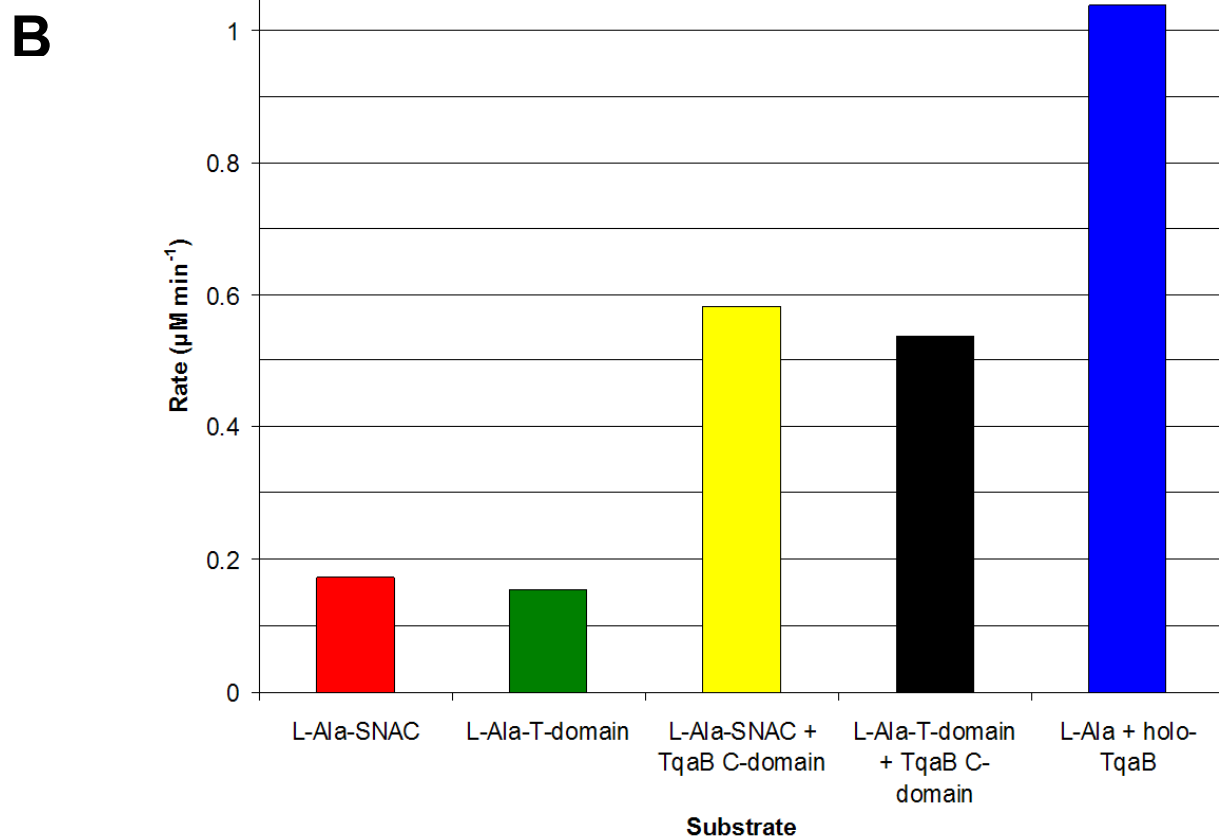

**Figure S5.** (A) SDS-PAGE analysis of proteins used during these investigations (B) UV spectroscopic traces of FAD-monoxygenases Af12060 and TqaH. Absorbances at 280 nm were used to calculate the enzymes concentration (using the extinction coefficient estimated from protein primary sequence at 280 nm), while absorbances at 445 nm were used to calculate the concentration of FAD (using the known extinction coefficient for FAD at 445 nm of  $11,300 \text{ M}^{-1} \text{ cm}^{-1}$ ). Ratios of absorbances for each protein at 280 nm and 445 nm were used to estimate the percentage of protein with FAD bound in each case.

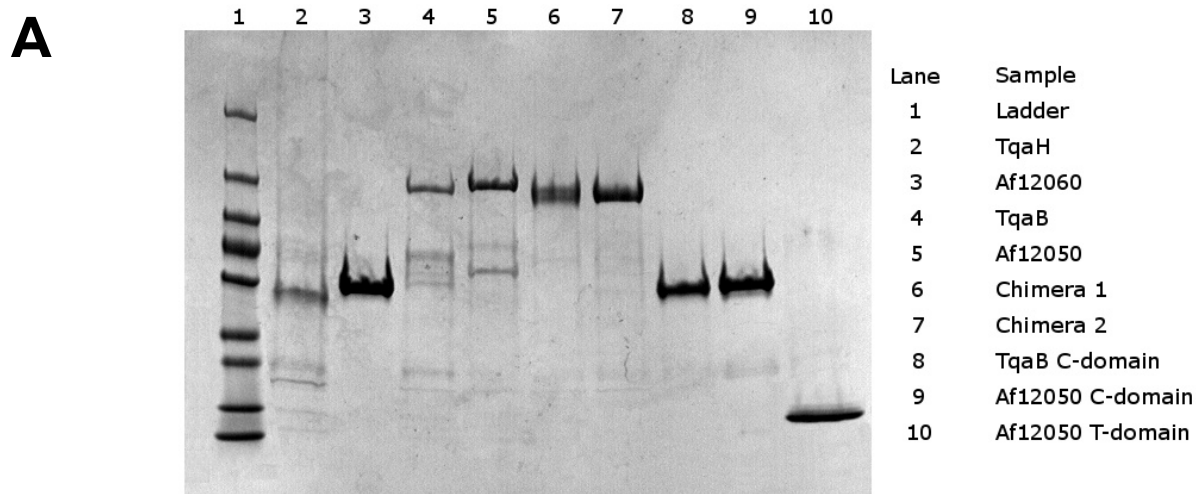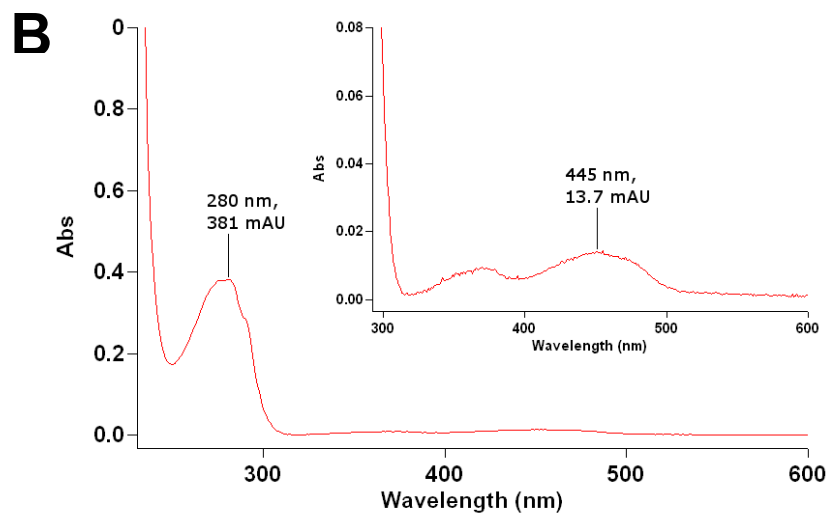

### Af12060:

$$E_{280 \text{ nm}} = 91,900 \text{ M}^{-1} \text{ cm}^{-1}$$

$$\text{Af12060 conc.} = 4.15 \text{ } \mu\text{M}$$

$$\text{FAD conc.} = 1.21 \text{ } \mu\text{M}$$

Protein bound with FAD: 29.2 %

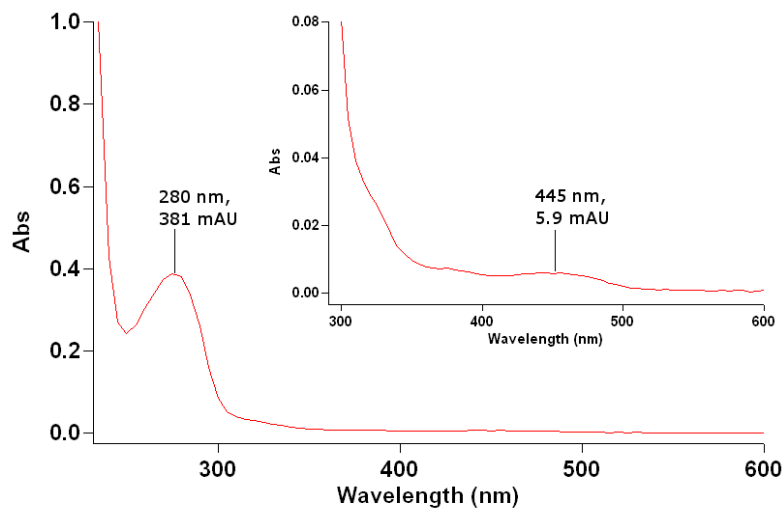

### TqaH:

$$E_{280 \text{ nm}} = 78,380 \text{ M}^{-1} \text{ cm}^{-1}$$

$$\text{TqaH conc.} = 4.86 \text{ } \mu\text{M}$$

$$\text{FAD conc.} = 0.52 \text{ } \mu\text{M}$$

Protein bound with FAD: 10.6 %

**Figure S6.** UV spectroscopic analysis of compounds key to these investigations recorded via HPLC equipped with a DAD in a mixture of acetonitrile and water plus (0.1% trifluoroacetic acid).

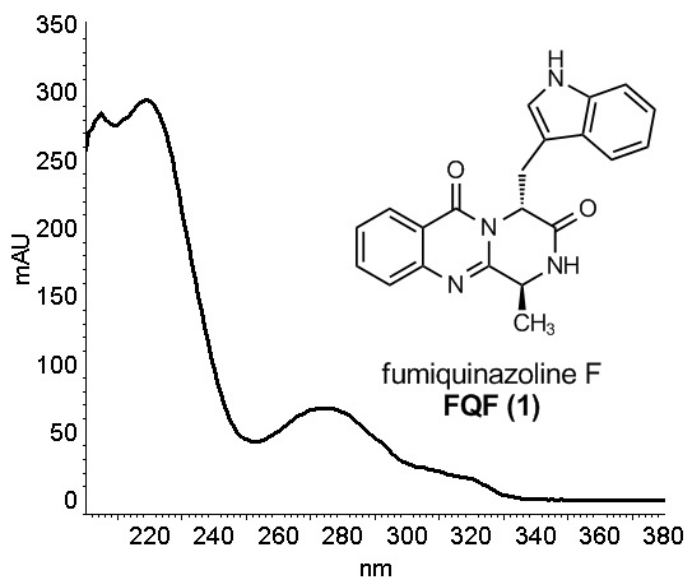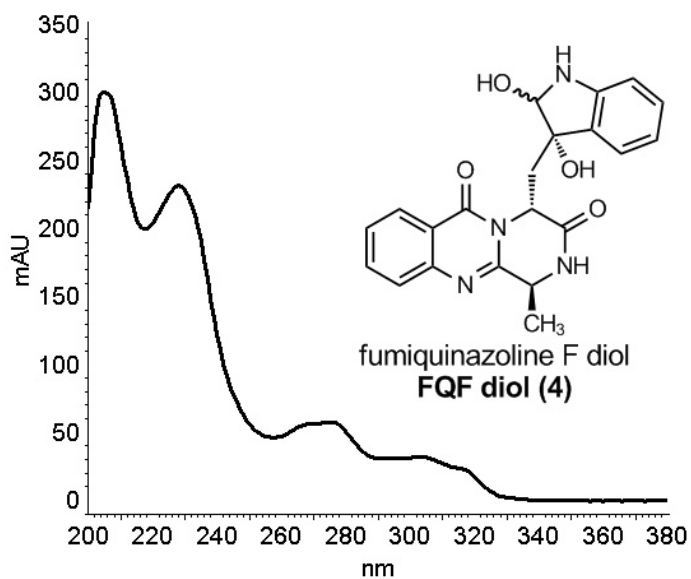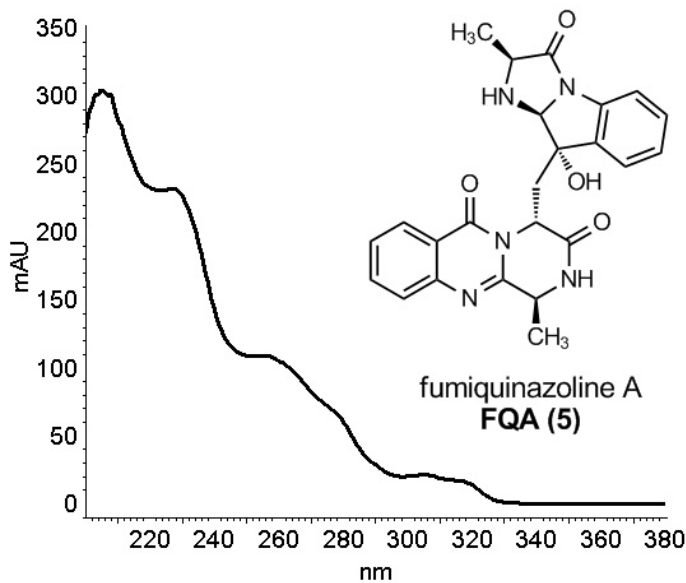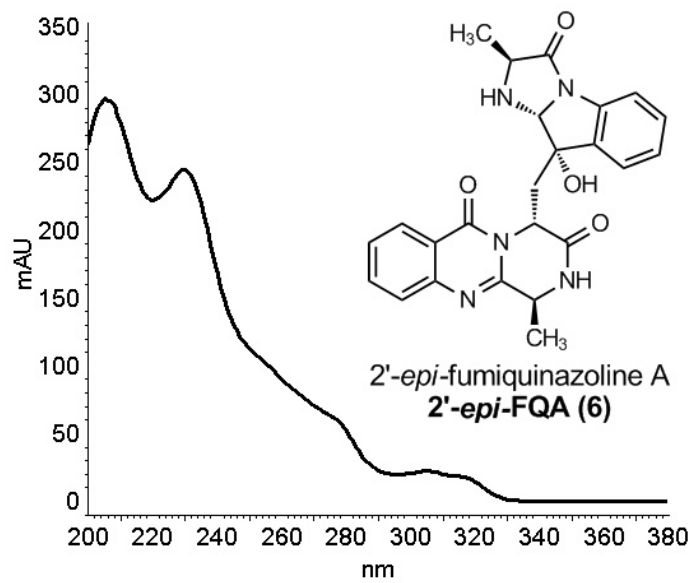

**Figure S7:** Analysis of substrate specificity of chimera 1 with respect to L-alanine, D-Ala and dimethyl analog 2-aminoisobutyric acid (2-AIB). Analyses were performed using HPLC detection at 254 nm and identities of 2'-*epi*-FQA analogues were corroborated by UV and MS analysis.

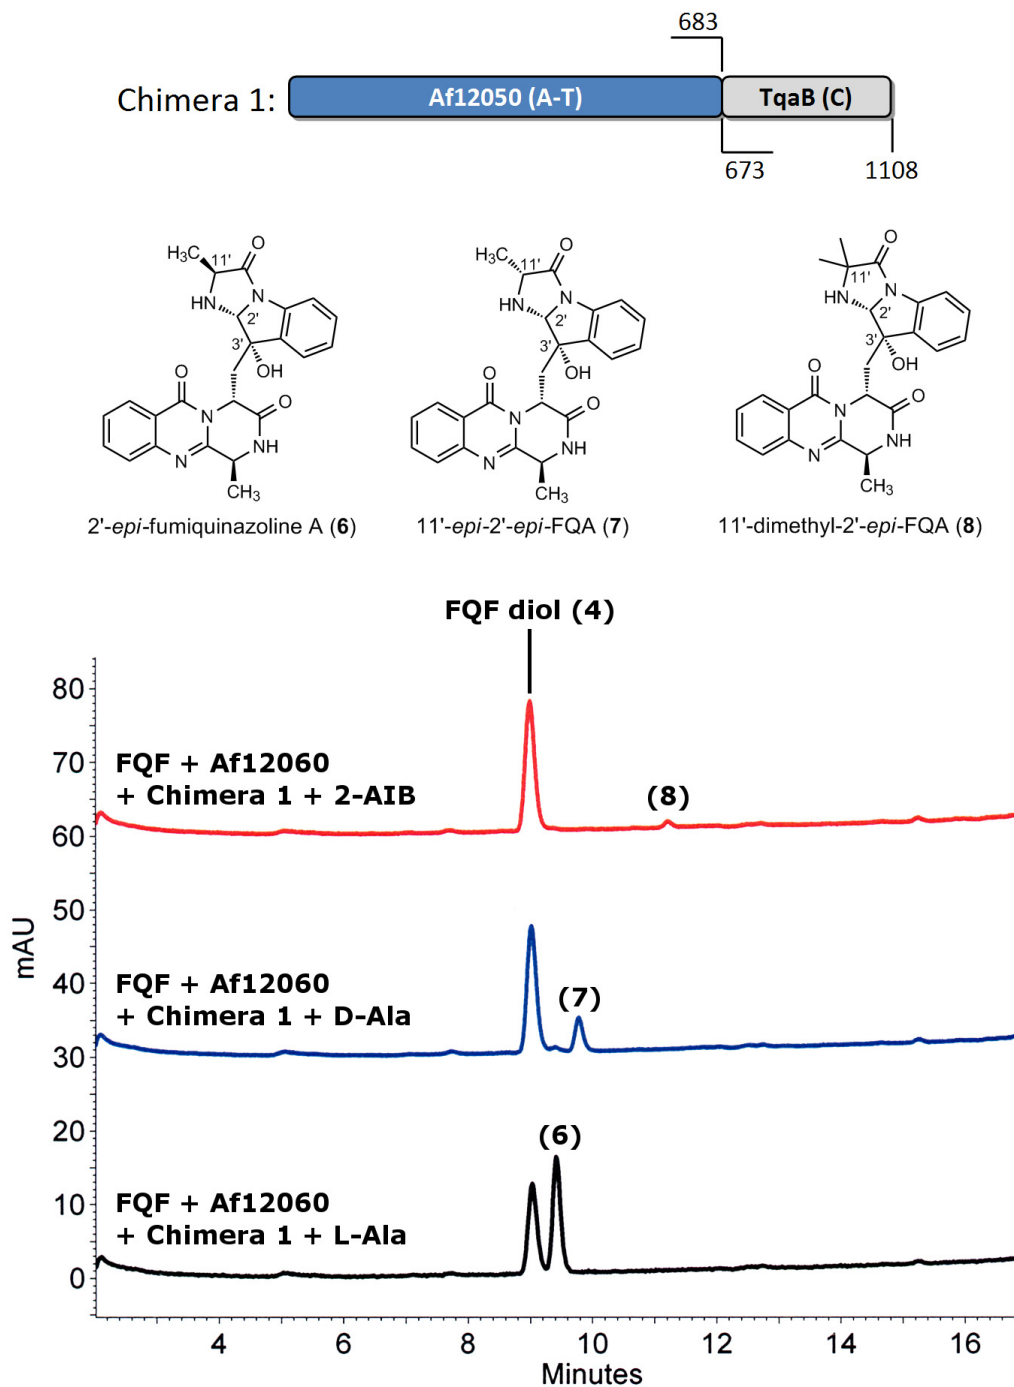

**HRMS:** Chimera 1 + 2-AIB (4)  $m/z$  calculated for  $C_{21}H_{20}N_4O_4$ : 375.1452  $[M-(H_2O) + H]^+$ . Found 375.1453  
(8)  $m/z$  calculated for  $C_{25}H_{25}N_5O_4$ : 460.1979  $[M + H]^+$ . Found 460.1980

Chimera 1 + D-Ala (4)  $m/z$  calculated for  $C_{21}H_{20}N_4O_4$ : 375.1452  $[M-(H_2O) + H]^+$ . Found 375.1454  
(7)  $m/z$  calculated for  $C_{24}H_{23}N_5O_4$ : 446.1823  $[M + H]^+$ . Found 446.1826

Chimera 1 + L-Ala (4)  $m/z$  calculated for  $C_{21}H_{20}N_4O_4$ : 375.1452  $[M-(H_2O) + H]^+$ . Found 375.1449  
(6)  $m/z$  calculated for  $C_{24}H_{23}N_4O_4$ : 446.1823  $[M + H]^+$ . Found 446.1827



**Figure S8:** Analysis of substrate specificity of chimera 2 with respect to L-alanine, D-Ala and dimethyl analog 2-aminoisobutyric acid (2-AIB). Analyses were performed using HPLC detection at 254 nm and identities of FQA analogues corroborated by UV and MS analysis.

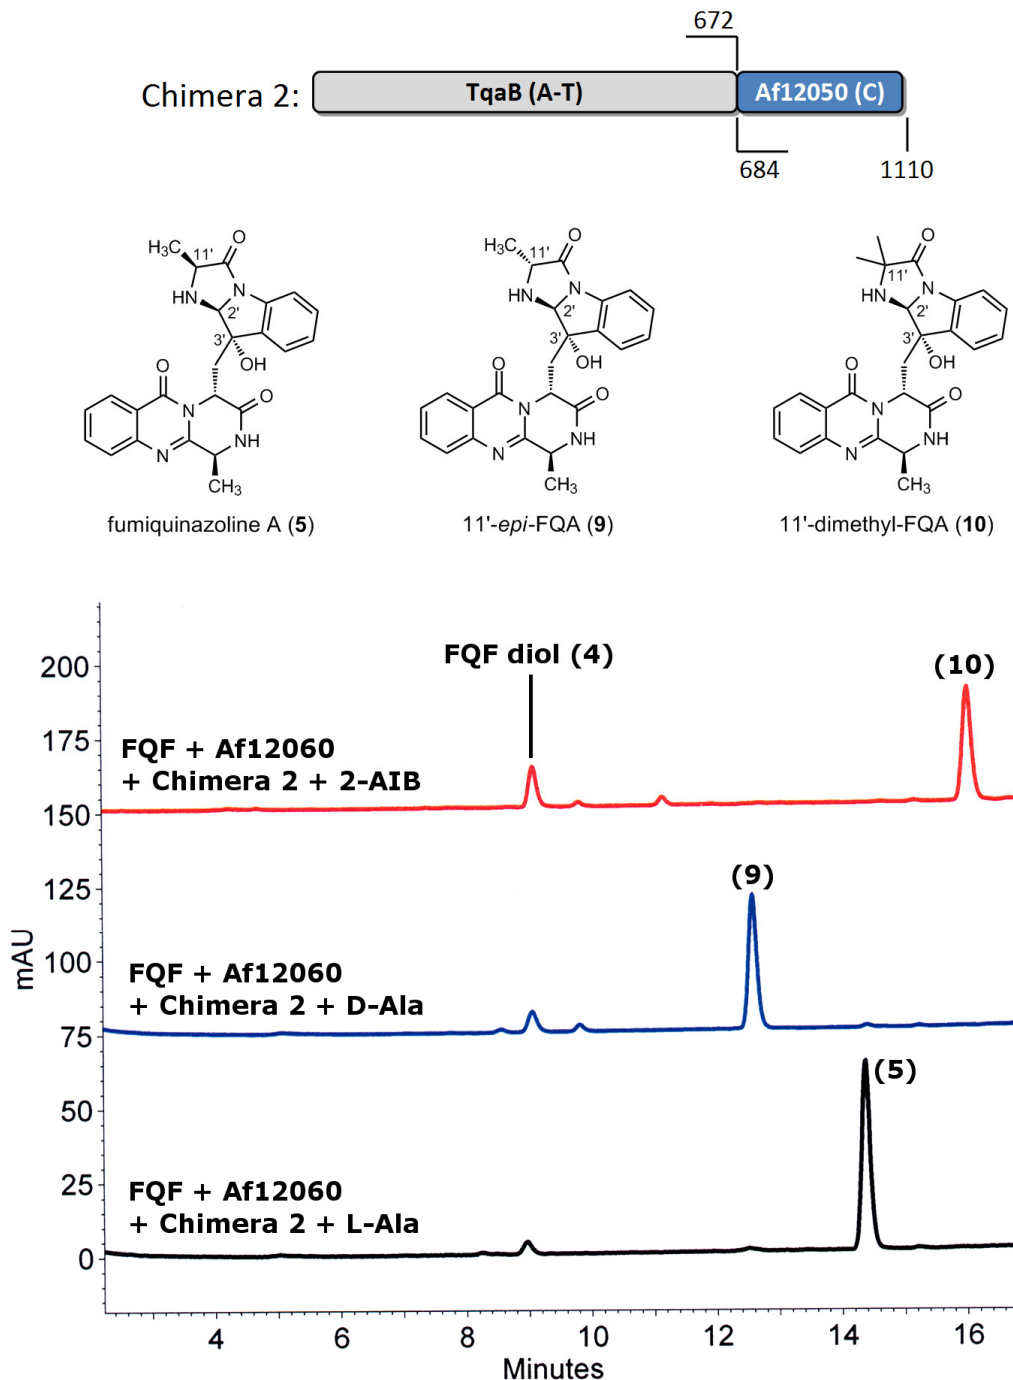

**HRMS:** Chimera 2 + 2-AIB (4)  $m/z$  calculated for  $C_{21}H_{20}N_4O_4$ : 375.1452  $[M-(H_2O) + H]^+$ . Found 375.1449  
 (10)  $m/z$  calculated for  $C_{25}H_{25}N_5O_4$ : 460.1979  $[M + H]^+$ . Found 460.1977

Chimera 2 + D-Ala (4)  $m/z$  calculated for  $C_{21}H_{20}N_4O_4$ : 375.1452  $[M-(H_2O) + H]^+$ . Found 375.1451  
 (9)  $m/z$  calculated for  $C_{24}H_{23}N_5O_4$ : 446.1823  $[M + H]^+$ . Found 446.1823

Chimera 2 + L-Ala (4)  $m/z$  calculated for  $C_{21}H_{20}N_4O_4$ : 375.1452  $[M-(H_2O) + H]^+$ . Found 375.1452  
 (5)  $m/z$  calculated for  $C_{24}H_{23}N_4O_4$ : 446.1823  $[M + H]^+$ . Found 446.1825

**Figure S9:** (A) Synthesis of L-Ala SNAC via PyBOP mediated coupling of *N*-BOC L-Ala with *N*-acetylcysteamine (B) Structure and synthetic route to L-Ala SNAC analogs used attempting to probe the route of dual N-C bond formation in FQA biosynthesis.

**A**

**L-Ala SNAC**

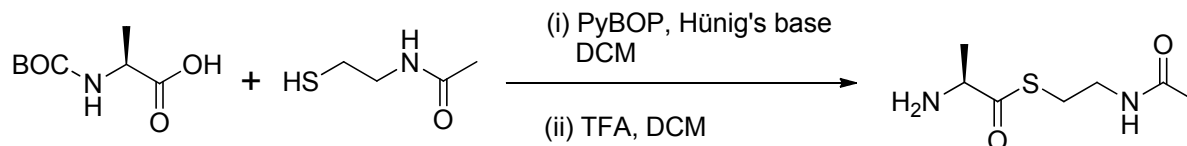

**B**

**Propyl SNAC**

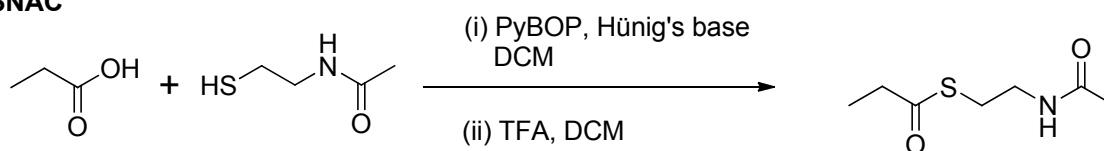

**L-Lactic acid SNAC**

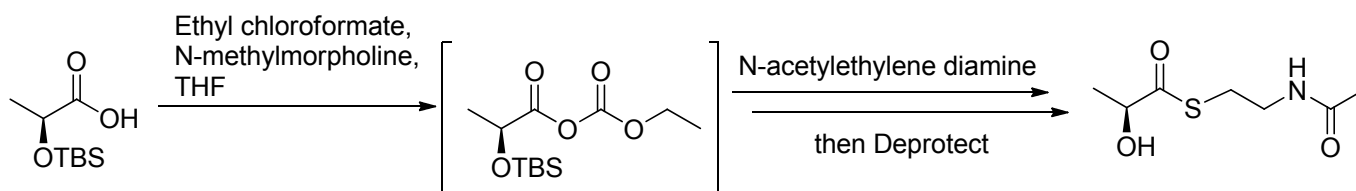

**Alaninol SNAC**

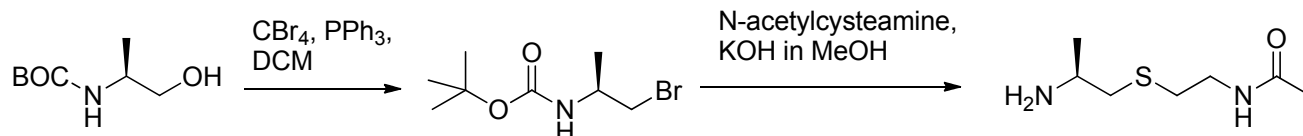

**L-Ala amide**

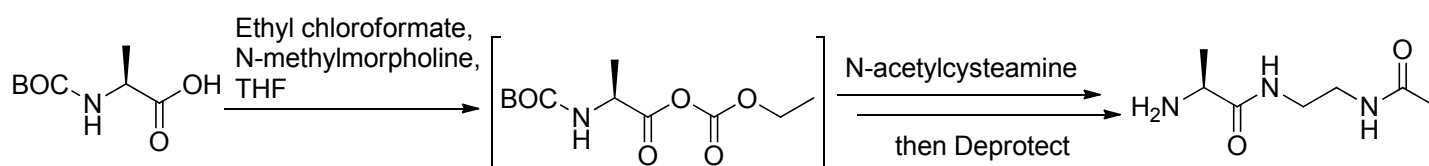

**Figure S10:** Neighbor-joining phylogenetic tree and active site motif for the C-domains of fungal monomodular NRPSs of domain organization A-T-C identified in this work. Arrows highlight the two C-domains characterized in this work. Sequence alignment and tree construction were performed using Clustal W (10).

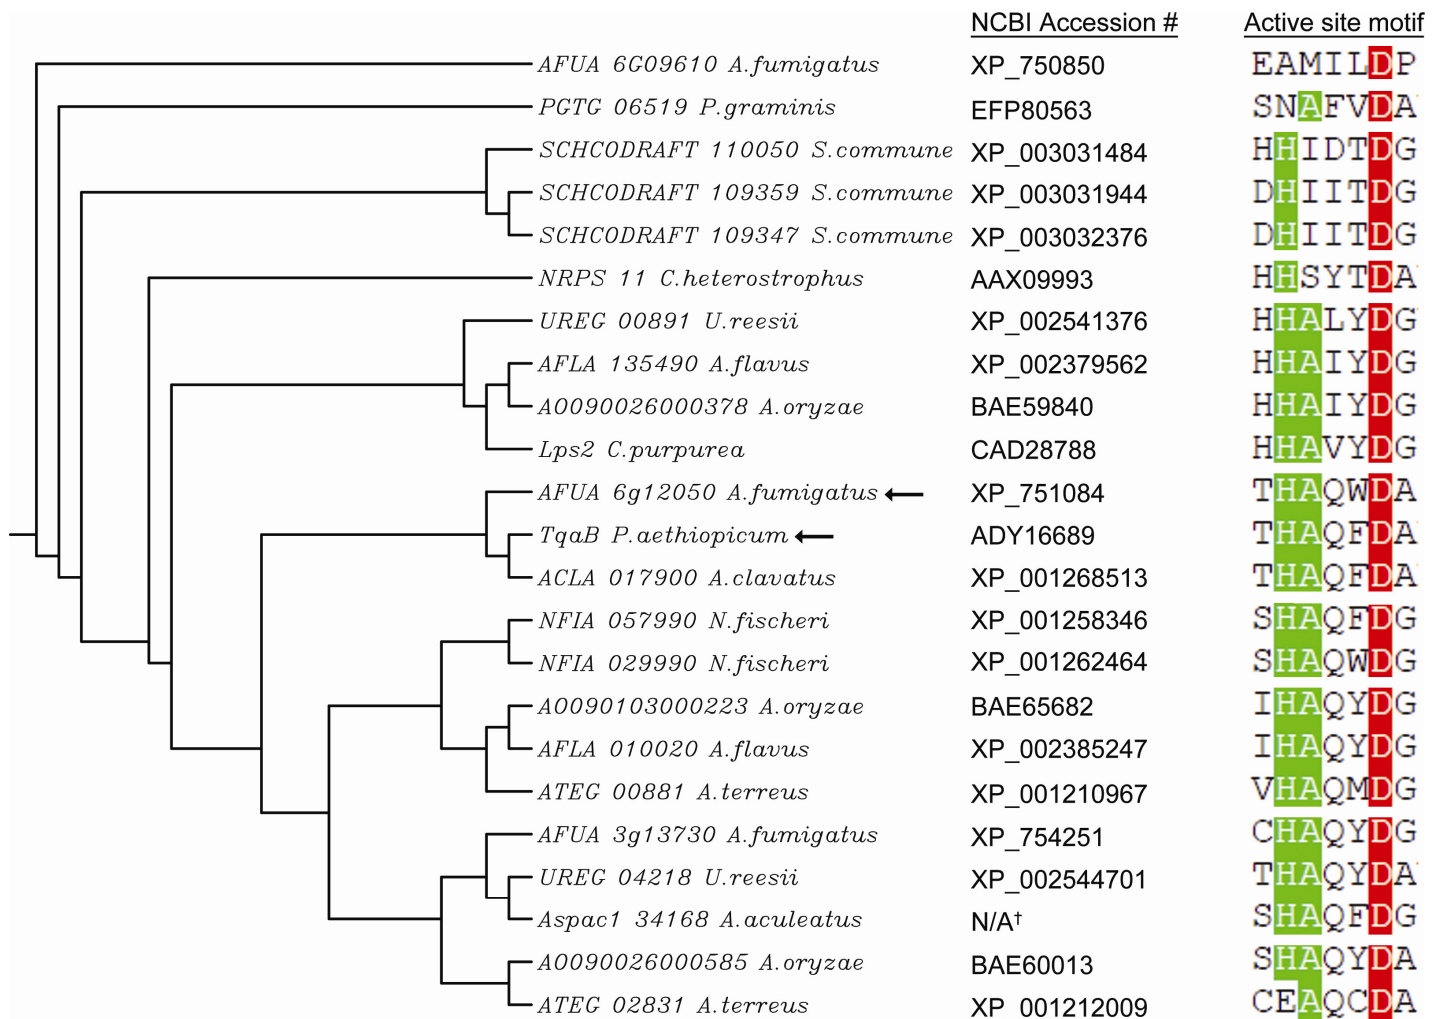

<sup>†</sup>The sequence for Aspac1\_34168 from *Aspergillus aculeatus* was obtained from <http://genome.jgi-psf.org/> with the FASTA header: jgi|Aspac1|34168|e\_gw1.16.3.1. This sequence was not present in the NCBI database at the time of manuscript submission.

**Figure S11:** Stereochemical differences between fungal metabolites formed by proposed to be formed by the catalytic action of terminal C-domains, as highlighted by comparison with fumiquinazoline A and tryptoquialanine (derived from 2'-*epi*-FQA).

**(A) C-N bond stereochemistry 'trans-' to orientation of oxy-indole derived hydroxyl.**

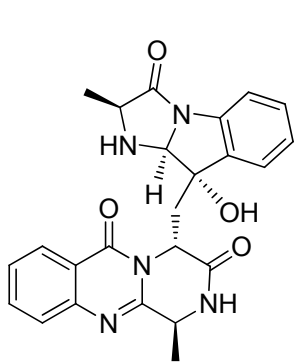

**Fumiquinazoline A**

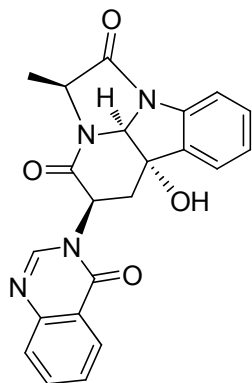

**Chaetominine**

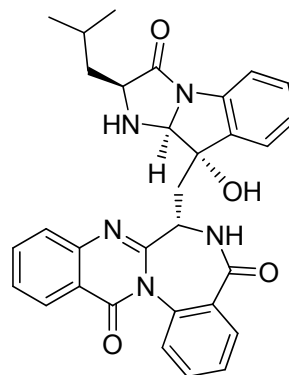

**Asperlicin**

**(B) C-N bond stereochemistry 'cis-' to orientation of oxy-indole derived hydroxyl.**

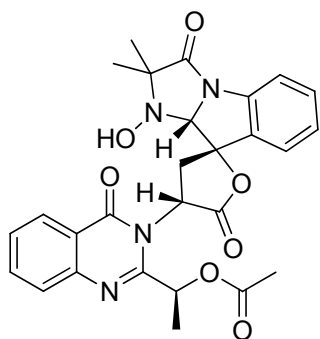

**Tryptoquialanine A**

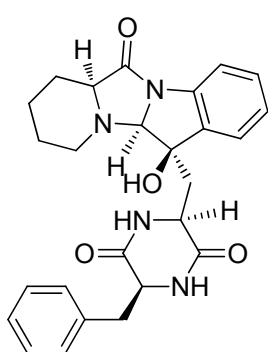

**Lumpidin**

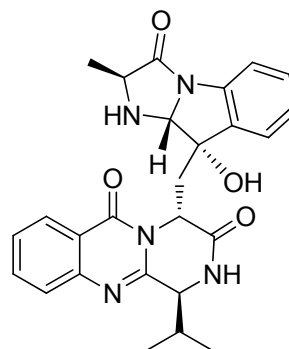

**Fiscalin**

**Table S1:** Cloning primers used in this work for the generation of expression vectors

| Primer             | Sequence                                               |
|--------------------|--------------------------------------------------------|
| Af12050_C-v1_for*  | 5'- GGTATTGAGGGTCGCcagctggagtcgtcactggtgg -3'          |
| Af12050_C-v1_rev*  | 5'- AGAGGAGAGTTAGAGCCtcacaccgtaatctcagataacagagc -3'   |
| TqaB_C-v1_for*     | 5'- GGTATTGAGGGTCGCcagctgaactcagctgtgacagatc -3'       |
| TqaB_C-v1_rev*     | 5'- AGAGGAGAGTTAGAGCCtaccctgtgatcttggagagcaattc -3'    |
| Af12050_T_for*     | 5'- GACGACGACAAGATGgaccaaccGgtaaccagctggaag -3'        |
| Af12050_T_rev*     | 5'- GAGGAGAAGCCCGGTTAgcgggggtcctgttcttggac-3'          |
| TqaB_T_for*        | 5'- GACGACGACAAGATGggccagccGtcaaccagctc -3'            |
| TqaB_T_rev*        | 5'- GAGGAGAAGCCCGGTTAcgatggtgtggtgacatggg -3'          |
| Chimera-1_for*†    | 5'- CAGGGACCCGGTatgttgagacgacggagcc -3'                |
| Chimera-1_int_rev† | 5'- ctgtcacagctgagttcagctggaaggaggtgcagccgcggg -3'     |
| Chimera-1_int_for† | 5'- cccgcggctgcacctcctccagctgaactcagctgtgacag -3'      |
| Chimera-1_rev*†    | 5'- GGCACCAGAGCGTTcccgtgatcttggagagcaattc -3'          |
| Chimera-2_for*†    | 5'- CAGGGACCCGGTatggctagcatgactggtggacag -3'           |
| Chimera-2_int_rev† | 5'- ccaccagtgacgactccagctggaatgataaccgacgatggtgtgg -3' |
| Chimera-2_int_for† | 5'- ccacaccatcgtcggatcattccagctggagtcgtcactggtgg -3'   |
| Chimera-2_rev*†    | 5'- GGCACCAGAGCGTTcaccgtaatctcagataacagagc -3'         |
| TqaH_NdeI_for:     | 5'- AAAAAACATatgacaaccgacctcaaccat-3'                  |
| TqaH_EcoRI_rev:    | 5'- TTTTTTGAATTcaccgcgcttgtatgtattc-3'                 |

\*Lowercase type signifies nucleotides complementary to the gene of interest. Uppercase type represents the LIC overhangs used for cloning (5' end) or bases to be mutated for codon optimization.

†Underlined portion is Af12050-specific, plain-type is TqaB specific.

**Table S2:** NMR spectroscopic characterization and assignments of FQF diol. Compound observed as a 1:1 mixture of diastereomers at C2'. Diastereomer for which each signal is responsible is indicated by subscript A or B.

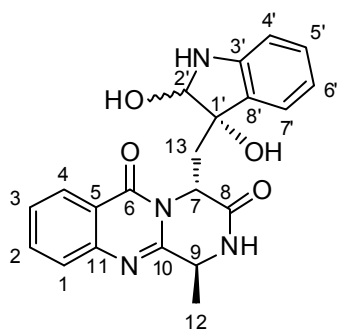

|                 | <sup>1</sup> H | <sup>13</sup> C |
|-----------------|----------------|-----------------|
| 1 <sub>A</sub>  | 7.70           | 127.49          |
| 1 <sub>B</sub>  | 7.67           | 127.49          |
| 2 <sub>A</sub>  | 7.83           | 136.38          |
| 2 <sub>B</sub>  | 7.83           | 136.38          |
| 3 <sub>A</sub>  | 7.56           | 128.71          |
| 3 <sub>B</sub>  | 7.53           | 128.71          |
| 4 <sub>A</sub>  | 8.16           | 127.26          |
| 4 <sub>B</sub>  | 8.10           | 127.26          |
| 5 <sub>A</sub>  | -              | 120.82          |
| 5 <sub>B</sub>  | -              | 120.82          |
| 6 <sub>A</sub>  | -              | Not seen        |
| 6 <sub>B</sub>  | -              |                 |
| 7 <sub>A</sub>  | 5.75           | 54.37           |
| 7 <sub>B</sub>  | 5.53           | 53.81           |
| 8 <sub>A</sub>  | -              | 171.82          |
| 8 <sub>B</sub>  | -              | 171.20          |
| 9 <sub>A</sub>  | 4.93           | 49.83           |
| 9 <sub>B</sub>  | 4.88           | 49.96           |
| 10 <sub>A</sub> | -              | 153.92          |
| 10 <sub>B</sub> | -              | 153.53          |
| 11 <sub>A</sub> | -              | 147.34          |
| 11 <sub>B</sub> | -              | 147.34          |
| 12 <sub>A</sub> | 1.63           | 16.86           |
| 12 <sub>B</sub> | 1.61           | 16.86           |
| 13 <sub>A</sub> | 2.54 and 2.57  | 33.90           |
| 13 <sub>B</sub> | 2.39 and 2.28  | 38.67           |
| 1' <sub>A</sub> | -              | 81.51           |
| 1' <sub>B</sub> | -              | 80.03           |
| 2' <sub>A</sub> | 4.97           | 89.87           |
| 2' <sub>B</sub> | 4.98           | 87.67           |
| 3' <sub>A</sub> | -              | 149.13          |
| 3' <sub>B</sub> | -              | 148.10          |
| 4' <sub>A</sub> | 6.67           | 111.59          |
| 4' <sub>B</sub> | 6.63           | 111.46          |
| 5' <sub>A</sub> | 7.12           | 131.22          |
| 5' <sub>B</sub> | 7.07           | 130.71          |
| 6' <sub>A</sub> | 6.72           | 120.01          |
| 6' <sub>B</sub> | 6.72           | 120.43          |
| 7' <sub>A</sub> | 7.18           | 124.08          |
| 7' <sub>B</sub> | 7.28           | 125.14          |
| 8' <sub>A</sub> | -              | 131.72          |
| 8' <sub>B</sub> | -              | 130.99          |

**Table S3:** NMR spectroscopic characterization and assignments of 2'-*epi*-FQA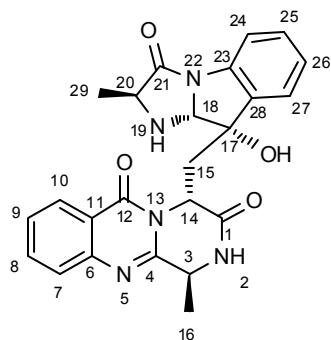

|                 | <sup>1</sup> H<br>(multiplicity, coupling constant,<br>integral value) | <sup>13</sup> C |
|-----------------|------------------------------------------------------------------------|-----------------|
| 1               | -                                                                      | 168.95          |
| 2 (-NH)         | 6.03 (s, 1 H)                                                          | -               |
| 3               | 4.80 (q, <i>J</i> =6.75 Hz, 1 H)                                       | 48.87           |
| 4               | -                                                                      | 150.11          |
| 5               | -                                                                      | -               |
| 6               | -                                                                      | 146.29          |
| 7               | 7.71 (d, <i>J</i> =8.22 Hz, 1 H)                                       | 127.04          |
| 8               | 7.79 (m, 1 H)                                                          | 134.26          |
| 9               | 7.53 (m, 1 H)                                                          | 127.01          |
| 10              | 8.32 (d, <i>J</i> =7.92 Hz, 1 H)                                       | 126.57          |
| 11              | -                                                                      | 119.85          |
| 12              | -                                                                      | 160.03          |
| 13              | -                                                                      | -               |
| 14              | 5.89 (dd, <i>J</i> =8.22, 3.96 Hz, 1 H)                                | 51.33           |
| 15 <sub>A</sub> | 2.75 (dd, <i>J</i> =14.53, 3.96 Hz, 1 H)                               | 39.05           |
| 15 <sub>B</sub> | 2.46 (dd, <i>J</i> =14.53, 8.36 Hz, 1 H)                               |                 |
| 16              | 1.81 (d, <i>J</i> =6.75 Hz, 3 H)                                       | 16.83           |
| 17              | -                                                                      | 73.88           |
| 18              | 5.44 (s, 1 H)                                                          | 80.54           |
| 19              | Not seen                                                               | -               |
| 20              | 4.00 (q, <i>J</i> =7.04 Hz, 1 H)                                       | 59.92           |
| 21              | -                                                                      | 173.59          |
| 22              | -                                                                      | -               |
| 23              | -                                                                      | 137.47          |
| 24              | 7.53 (m, 1 H)                                                          | 115.42          |
| 25              | 7.33 (t, <i>J</i> =7.63 Hz, 1 H)                                       | 129.63          |
| 26              | 7.11 (t, <i>J</i> =7.63 Hz, 1 H)                                       | 124.79          |
| 27              | 7.30 (d, <i>J</i> =7.63 Hz, 1 H)                                       | 123.47          |
| 28              | -                                                                      | 136.56          |
| 29              | 1.55 (d, <i>J</i> =7.04 Hz, 3 H)                                       | 18.30           |
| -OH             | 4.85 (br. s, 1 H)                                                      | -               |
